# Supplementary material
Source: publisher figshare collection journal article supplement (https://frontiersin.figshare.com/ndownloader/files/14073323)
Supplement: Supplementary file 1 [file 14073323]

Table S1. Summary of data on lipids (% of dry mass (DM)), δ13Cbulk (‰), δ13Cextraction (‰), δ15N (‰), fatty acids (% of total fatty acids), and compound-specific stable isotopes of FAs (CSIA (‰)).

| Group | 1 | | | 2 | | 3 | | 4 | | 5 | | | |
| --- | --- | --- | --- | --- | --- | --- | --- | --- | --- | --- | --- | --- | --- |
| Species | *M. obtu-sirostre* | *C. town-sendi* | *C. warmingii* | *C. minimus* | *S. affinis* | *M. bericoides* | *C. atraria* | *B. antrodes* | *E. normalops* | *H. ophistoma* | *C. pseu-dopallida* | *M. polylepis* | *S. nebulosus* |
| No. of samples | 3 | 4 | 3 | 3 | 2 | 4 | 5 | 3 | 4 | 3 | 4 | 4 | 4 |
| Lipids (%DM) | 34.0±1.0 | 36.0±0.2 | 33.0±1.0 | 24.7±2.1 | 24.0±1.0 | 29.5±0.5 | 28.3±0.7 | 23.0±1.0 | 27.0±0.8 | 21.5±1.5 | 27.6±1.4 | 26.5±2.9 | 23.0±2.0 |
| δ13Cbulk (‰) | -20.5±0.2 | -20.8±0.1 | -20.4±0.2 | -19.3±0.2 | -19.3±0.1 | -19.9±0.5 | -20.7±0.1 | -18.9±0.1 | -19.4±0.1 | -19.3±0.1 | -19.0±0.2 | -19.8±0.1 | -19.3±0.1 |
| δ13Cextraction (‰) | -19.1±0.2 | -19.1±0.1 | -19.1±0.3 | -19.0±0.2 | -18.9±0.1 | -18.4±0.2 | -18.6±0.1 | -18.3±0.1 | -18.9±0.1 | -18.5±0.1 | -18.5±0.1 | -18.4±0.2 | -18.4±0.1 |
| δ15N (‰) | 8.5±0.2 | 8.2±0.2 | 9.1±0.1 | 9.3±0.4 | 9.8±0.1 | 10.2±0.5 | 10.6±0.1 | 10.6±0.3 | 10.5±0.2 | 10.6±0.0 | 10.0±0.1 | 10.4±0.2 | 10.4±0.3 |
| Fatty acids (%) |  |  |  |  |  |  |  |  |  |  |  |  |  |
| 14:0 | 1.6±0.1 | 2.7±0.3 | 1.9±0.4 | 0.9±0.1 | 1.1±0.1 | 3.6±0.1 | 3.4±0.5 | 1.8±0.1 | 1.7±0.2 | 0.9±0.1 | 1.4±0.1 | 1.8±0.6 | 1.4±0.1 |
| 16:0 | 26.2±1.2 | 25.0±0.1 | 25.1±0.2 | 20.3±0.3 | 24.6±0.2 | 21.5±0.4 | 21.8±0.4 | 22.7±0.3 | 24.0±0.3 | 21.1±0.6 | 21.2±0.7 | 19.9±0.7 | 20.7±0.3 |
| 16:1n-7 | 3.4±0.6 | 3.9±0.5 | 3.1±0.3 | 2.5±0.1 | 2.4±0.1 | 4.1±0.1 | 3.9±0.2 | 3.9±0.1 | 1.4±0.2 | 2.6±0.1 | 2.1±1.1 | 3.8±1.1 | 3.0±0.2 |
| 17:0 | 1.6±0.1 | 1.2±0.2 | 1.5±0.1 | 0.8±0.1 | 0.8±0.1 | 2.6±0.1 | 1.9±0.7 | 1.0±0.1 | 0.6±0.1 | 0.7±0.1 | 0.7±0.1 | 0.7±0.1 | 0.7±0.1 |
| 18:0 | 8.5±0.2 | 5.4±0.8 | 7.5±1.3 | 5.7±0.1 | 5.0±0.1 | 6.9±0.8 | 5.0±0.2 | 5.5±0.1 | 4.9±0.3 | 5.9±0.1 | 5.0±0.3 | 4.6±0.2 | 4.5±0.1 |
| 18:1n-9 | 12.4±1.7 | 11.8±0.2 | 12.9±1.2 | 15.1±1.2 | 14.8±0.6 | 27.4±0.7 | 23.0±1.8 | 16.9±0.6 | 16.8±1.9 | 16.4±0.3 | 18.9±1.2 | 12.6±1.3 | 11.8±0.5 |
| 18:1n-7 | 2.8±0.2 | 2.2±0.3 | 2.6±0.1 | 0.6±0.8 | 0.1±0.1 | 0.1±0.1 | 0.7±0.9 | 1.8±0.1 | 0.3±0.4 | 2.1±0.1 | 1.5±0.1 | 2.3±0.4 | 2.2±0.1 |
| 18:2n-6 | 1.7±0.1 | 1.3±0.1 | 1.6±0.2 | 0.9±0.1 | 1.1±0.1 | 0.6±0.1 | 0.7±0.1 | 1.2±0.1 | 0.3±0.1 | 0.9±0.1 | 0.8±0.1 | 0.9±0.2 | 0.8±0.1 |
| 20:1n-9 | 0.5±0.1 | 1.2±0.1 | 0.8±0.3 | 0.6±0.1 | 0.7±0.1 | 4.2±0.1 | 4.5±0.3 | 0.9±0.1 | 1.5±0.1 | 1.1±0.1 | 0.9±0.1 | 2.6±0.5 | 2.7±0.2 |
| 20:4n-6 | 2.9±0.2 | 2.9±1.0 | 3.5±0.4 | 3.7±0.7 | 3.9±0.2 | 3.0±0.9 | 4.0±0.5 | 4.1±0.1 | 2.8±0.3 | 3.0±0.2 | 3.3±0.2 | 4.9±0.3 | 5.2±0.3 |
| 20:5n-3 | 6.6±0.3 | 7.0±1.0 | 6.7±0.2 | 5.5±0.8 | 4.7±0.3 | 5.6±0.7 | 6.0±0.6 | 5.7±0.1 | 6.7±0.5 | 5.1±0.5 | 6.4±0.5 | 6.6±0.6 | 6.5±0.1 |
| 22:1n-9 | 0.3±0.1 | 0.3±0.1 | 0.3±0.1 | 0.1±0.1 | 0.2±0.1 | 2.5±0.1 | 2.7±0.1 | 0.5±0.1 | 0.2±0.1 | 0.3±0.3 | 0.9±0.6 | 0.8±0.9 | 0.3±0.1 |
| 22:5n-3 | 0.0±0.0 | 2.9±1.5 | 0.7±0.7 | 1.2±0.2 | 1.9±0.9 | 0.8±0.1 | 1.0±0.1 | 1.5±0.1 | 1.3±0.1 | 0±0 | 1.8±0.2 | 1.5±0.1 | 1.6±0.1 |
| 22:6n-3 | 30.6±0.2 | 31.3±1.1 | 31.0±0.9 | 41.3±0.8 | 38.1±0.7 | 16.3±2.3 | 20.8±3.5 | 31.6±0.3 | 37.0±0.9 | 39.1±1.9 | 34.4±1.4 | 36.3±3.8 | 38.0±0.8 |
|  |  |  |  |  |  |  |  |  |  |  |  |  |  |
| n-3PUFA | 37.3±0.3 | 41.3±1.5 | 38.4±1.4 | 48.0±0.8 | 44.8±0.2 | 22.6±1.1 | 27.7±2.1 | 38.8±0.3 | 44.9±1.3 | 44.2±1.4 | 42.6±1.4 | 44.4±3.2 | 46.1±0.6 |
| 20:1+22:1 | 0.8±0.1 | 1.5±0.1 | 1.2±0.4 | 0.7±0.1 | 0.9±0.1 | 6.8±0.1 | 7.2±0.3 | 1.4±0.1 | 1.7±0.1 | 1.4±0.3 | 1.8±0.7 | 3.4±1.4 | 3.0±0.0 |
| DHA/EPA | 4.6±0.2 | 4.5±0.6 | 4.6±0.4 | 7.6±1.1 | 8.1±0.4 | 2.9±0.1 | 3.5±0.4 | 5.6±0.1 | 5.5±0.2 | 7.8±0.5 | 5.4±0.4 | 5.6±0.6 | 5.8±0.3 |
| CSIA (‰) |  |  |  |  |  |  |  |  |  |  |  |  |  |
| 20:4n-6 | -27.9±0.1 | -28.6±0.2 | -28.2±0.4 | -34.3±0.3 | -34.1±0.5 | -30.8±0.2 | -31.2±0.2 | -28.5±0.2 | -28.5±0.5 | -31.9±0.2 | -32.1±0.3 | -30.4±0.1 | -32.5±0.2 |
| 20:5n-3 | -27.3±0.6 | -26.6±0.1 | -26.6±0.1 | -28.5±0.7 | -28.4±0.1 | -28.8±0.2 | -28.8±0.2 | -26.6±0.0 | -25.8±0.2 | -28.2±0.3 | -29.2±0.3 | -28.0±0.1 | -29.1±0.3 |
| 22:6n-3 | -27.3±0.7 | -27.2±0.1 | -27.0±0.3 | -27.9±0.2 | -28.1±0.1 | -28.0±0.3 | -27.6±0.1 | -26.2±0.1 | -26.4±0.3 | -26.9±0.2 | -29.0±0.3 | -27.3±0.1 | -28.0±0.3 |
